# Supplementary material for: The application of Box-Behnken-Design in the optimization of HPLC separation of fluoroquinolones
Source: PubMed Central journal article supplement (PMC6923357; doi:10.1038/s41598-019-55761-z), 2019-12-19
Supplement: 41598_2019_55761_MOESM1_ESM.pdf [file 41598_2019_55761_MOESM1_ESM.pdf]

**The application of Box-Behnken-Design in the optimization of HPLC separation of  
fluoroquinolones**

Andrzej Czyrski, Justyna Sznura

**SUPPLEMENTARY INFORMATION**

## **PART A – The tables with the parameters of the statistical analysis**

- **The analysis of the model**

Table S.1. The six-factor model analysis for LEVO and CIPRO.

| Response               | <i>p-value</i> | R <sup>2</sup> | R <sup>2</sup> adjusted |
|------------------------|----------------|----------------|-------------------------|
| tr <sup>a</sup> cipro  | <0.0001        | 0.9877         | 0.9739                  |
| tr levo                | <0.0001        | 0.9891         | 0.9758                  |
| RRT <sup>b</sup> cipro | <0.0001        | 0.9864         | 0.9705                  |
| RRT levo               | <0.0001        | 0.9855         | 0.9677                  |
| Symmetry cipro         | <0.0001        | 0.9866         | 0.9666                  |
| Symmetry levo          | <0.0001        | 0.9911         | 0.9768                  |
| Tf <sup>c</sup> cipro  | <0.0001        | 0.9864         | 0.9672                  |
| Tf levo                | <0.0001        | 0.9778         | 0.9628                  |
| N <sup>d</sup> cipro   | <0.0001        | 0.9628         | 0.9429                  |
| N levo                 | <0.0001        | 0.9506         | 0.9437                  |
| FD <sup>e</sup> cipro  | <0.0001        | 0.9722         | 0.9579                  |
| FD levo                | <0.0001        | 0.9597         | 0.9616                  |
| Rs                     | <0.0001        | 0.9727         | 0.9644                  |
| PW <sup>f</sup> cipro  | <0.0001        | 0.9622         | 0.9482                  |
| PW levo                | <0.0001        | 0.9725         | 0.9607                  |

<sup>a</sup>tr- retention time; <sup>b</sup>RRT- Relative retention time; <sup>c</sup>Tf – tailing factor; <sup>d</sup>N – the number of theoretical plates <sup>e</sup>FD- Foley-Dorsey; <sup>f</sup>PW – peak width in half height

Table S.2. The four-factor model analysis for LEVO and MOXI.

| Response              | <i>p-value</i> | R <sup>2</sup> | R <sup>2</sup> adjusted |
|-----------------------|----------------|----------------|-------------------------|
| tr <sup>a</sup> moxi  | <0.0001        | 0.9992         | 0.9990                  |
| tr levo               | <0.0001        | 0.9993         | 0.9978                  |
| RRT <sup>b</sup> moxi | <0.0001        | 0.9980         | 0.9974                  |
| RRT levo              | <0.0001        | 0.9926         | 0.9906                  |
| Symmetry moxi         | <0.0001        | 0.9872         | 0.9808                  |
| Symmetry levo         | <0.0001        | 0.9912         | 0.9799                  |
| Tf <sup>c</sup> moxi  | <0.0001        | 0.9599         | 0.9476                  |
| Tf levo               | <0.0001        | 0.9952         | 0.9910                  |
| N <sup>d</sup> moxi   | <0.0001        | 0.9841         | 0.9618                  |
| N levo                | <0.0001        | 0.9964         | 0.9919                  |
| FD <sup>e</sup> moxi  | <0.0001        | 0.9888         | 0.9430                  |
| FD levo               | <0.0001        | 0.9762         | 0.9414                  |
| Rs                    | <0.0001        | 0.9897         | 0.9877                  |
| PW <sup>f</sup> moxi  | <0.0001        | 0.9974         | 0.9958                  |
| PW levo               | <0.0001        | 0.9766         | 0.9626                  |

<sup>a</sup>tr- retention time; <sup>b</sup>RRT- Relative retention time; <sup>c</sup>Tf – tailing factor; <sup>d</sup>N – the number of theoretical plates <sup>e</sup>FD- Foley-Dorsey; <sup>f</sup>PW – peak width in half height

- **The ANOVA test parameters for six-factor analysis**

Table S.3a. The ANOVA test for retention time of CIPRO and LEVO.

| Parameter      | CIPRO    |          | LEVO     |          |
|----------------|----------|----------|----------|----------|
|                | <i>F</i> | <i>p</i> | <i>F</i> | <i>P</i> |
| Model          | 169.00   | <0.0001  | 131.18   | <0.0001  |
| A-ACN          | 1292.74  | <0.0001  | 898.65   | <0.0001  |
| B-MeOH         | 454.78   | <0.0001  | 370.45   | <0.0001  |
| C-TEA          | 5.48     | 0.0246   | 15.24    | 0.0004   |
| E-pH           | 0.69     | 0.4099   | 9.67     | 0.0036   |
| F-flow         | 325.17   | <0.0001  | 300.38   | <0.0001  |
| AB             | 72.30    | <0.0001  | 55.63    | <0.0001  |
| AF             | 63.59    | <0.0001  | 31.49    | <0.0001  |
| BF             | 15.55    | 0.0003   | 15.81    | 0.0003   |
| A <sup>2</sup> | 156.64   | <0.0001  | 95.72    | <0.0001  |
| B <sup>2</sup> | 5.21     | 0.0282   | 5.24     | 0.0281   |
| C <sup>2</sup> | 21.56    | <0.0001  | 22.84    | <0.0001  |
| E <sup>2</sup> | 4.77     | 0.0352   | 5.66     | 0.0228   |
| F <sup>2</sup> | 11.64    | 0.0015   | 9.78     | 0.0035   |

Table S.3b. The ANOVA test for relative retention time of CIPRO and LEVO.

| Parameter                          | CIPRO    |          | LEVO     |          |
|------------------------------------|----------|----------|----------|----------|
|                                    | <i>F</i> | <i>p</i> | <i>F</i> | <i>p</i> |
| Model                              | 134.43   | <0.0001  | 152.54   | <0.0001  |
| A-ACN                              | 1037.87  | <0.0001  | 1389.53  | <0.0001  |
| B-MeOH                             | 209.61   | <0.0001  | 264.93   | <0.0001  |
| C-TEA                              | 64.44    | <0.0001  | 48.57    | <0.0001  |
| D-NaH <sub>2</sub> PO <sub>4</sub> | 16.52    | 0.0005   | 11.83    | 0.0015   |
| E-pH                               | 154.86   | <0.0001  | 154.76   | <0.0001  |
| F-flow                             | 0.31     | 0.5783   | 1.38     | 0.2476   |
| AB                                 | 25.81    | <0.0001  | 12.21    | 0.0013   |
| AE                                 | 9.10     | 0.0046   | 10.68    | 0.0024   |
| A <sup>2</sup>                     | 100.45   | <0.0001  | 67.01    | <0.0001  |
| C <sup>2</sup>                     | 17.41    | 0.0002   | 10.41    | 0.0027   |
| D <sup>2</sup>                     | 5.16     | 0.0290   | 6.78     | 0.0133   |
| E <sup>2</sup>                     | 11.42    | 0.0017   | 13.77    | 0.0007   |
| F <sup>2</sup>                     | 8.46     | 0.0061   | 8.30     | 0.0067   |

Table S.3c. The ANOVA test for symmetry of CIPRO and LEVO peaks.

| Parameter                          | CIPRO    |          | Parameter                          | LEVO     |          |
|------------------------------------|----------|----------|------------------------------------|----------|----------|
|                                    | <i>F</i> | <i>p</i> |                                    | <i>F</i> | <i>p</i> |
| Model                              | 70.15    | <0.0001  | Model                              | 89.72    | <0.0001  |
| A-ACN                              | 0.41     | 0.5265   | A-ACN                              | 661.65   | <0.0001  |
| B-MeOH                             | 13.78    | 0.0009   | B-MeOH                             | 82.75    | <0.0001  |
| C-TEA                              | 95.10    | <0.0001  | C-TEA                              | 27.54    | <0.0001  |
| D-NaH <sub>2</sub> PO <sub>4</sub> | 18.33    | 0.0002   | D-NaH <sub>2</sub> PO <sub>4</sub> | 7.04     | 0.0142   |
| E-pH                               | 200.39   | <0.0001  | E-pH                               | 72.28    | <0.0001  |
| F- flow                            | 2.88     | 0.1010   | F- flow                            | 22.91    | <0.0001  |
| AB                                 | 13.32    | 0.0011   | AB                                 | 21.60    | 0.0001   |
| BC                                 | 169.78   | <0.0001  | AC                                 | 116.96   | <0.0001  |
| BD                                 | 7.52     | 0.0105   | AD                                 | 28.67    | <0.0001  |
| BE                                 | 5.54     | 0.0259   | AE                                 | 73.39    | <0.0001  |
| CD                                 | 31.92    | <0.0001  | BC                                 | 146.61   | <0.0001  |
| DF                                 | 4.78     | 0.0373   | BE                                 | 23.44    | <0.0001  |
| A <sup>2</sup>                     | 47.82    | <0.0001  | CD                                 | 36.52    | <0.0001  |
| C <sup>2</sup>                     | 197.98   | <0.0001  | CE                                 | 7.46     | 0.0119   |
| D <sup>2</sup>                     | 9.83     | 0.0040   | CF                                 | 6.26     | 0.0199   |
| E <sup>2</sup>                     | 23.84    | <0.0001  | EF                                 | 16.52    | 0.0005   |
| F <sup>2</sup>                     | 369.50   | <0.0001  | B <sup>2</sup>                     | 118.01   | <0.0001  |
|                                    |          |          | C <sup>2</sup>                     | 195.51   | <0.0001  |
|                                    |          |          | D <sup>2</sup>                     | 68.90    | <0.0001  |
|                                    |          |          | E <sup>2</sup>                     | 116.23   | <0.0001  |
|                                    |          |          | F <sup>2</sup>                     | 50.20    | <0.0001  |

Table S.3d. The ANOVA test for the tailing factor of CIPRO and LEVO peaks.

| Parameter                          | CIPRO    |          | Parameter                          | LEVO     |          |
|------------------------------------|----------|----------|------------------------------------|----------|----------|
|                                    | <i>F</i> | <i>p</i> |                                    | <i>F</i> | <i>p</i> |
| Model                              | 64.40    | <0.0001  | Model                              | 64.96    | <0.0001  |
| A-ACN                              | 21.67    | <0.0001  | A-ACN                              | 641.07   | <0.0001  |
| B-MeOH                             | 18.75    | 0.0002   | B-MeOH                             | 76.52    | <0.0001  |
| C-TEA                              | 82.23    | <0.0001  | C-TEA                              | 24.68    | <0.0001  |
| D-NaH <sub>2</sub> PO <sub>4</sub> | 8.60     | 0.0066   | D-NaH <sub>2</sub> PO <sub>4</sub> | 17.82    | 0.0002   |
| E-pH                               | 90.25    | <0.0001  | E-pH                               | 12.70    | 0.0013   |
| F- flow                            | 2.10     | 0.1584   | F- flow                            | 10.11    | 0.0036   |
| AB                                 | 19.55    | 0.0001   | AB                                 | 8.01     | 0.0085   |
| AD                                 | 6.49     | 0.0166   | AC                                 | 60.93    | <0.0001  |
| AE                                 | 4.39     | 0.0453   | AD                                 | 22.69    | <0.0001  |
| BD                                 | 7.41     | 0.0110   | AE                                 | 35.76    | <0.0001  |
| BE                                 | 4.78     | 0.0374   | BC                                 | 94.00    | <0.0001  |
| CD                                 | 18.84    | 0.0002   | CD                                 | 24.82    | <0.0001  |
| CE                                 | 209.87   | <0.0001  | DE                                 | 10.28    | 0.0034   |
| A <sup>2</sup>                     | 13.39    | 0.0010   | EF                                 | 10.84    | 0.0027   |
| B <sup>2</sup>                     | 27.64    | <0.0001  | B <sup>2</sup>                     | 30.34    | <0.0001  |
| C <sup>2</sup>                     | 215.39   | <0.0001  | C <sup>2</sup>                     | 95.55    | <0.0001  |
| E <sup>2</sup>                     | 36.58    | <0.0001  | D <sup>2</sup>                     | 57.84    | <0.0001  |
| F <sup>2</sup>                     | 219.20   | <0.0001  | E <sup>2</sup>                     | 70.66    | <0.0001  |
|                                    |          |          | F <sup>2</sup>                     | 30.58    | <0.0001  |

Table S.3e. The ANOVA test for peak width in half height of CIPRO and LEVO peaks.

| Parameter                          | CIPRO    |          | Parameter                          | LEVO     |          |
|------------------------------------|----------|----------|------------------------------------|----------|----------|
|                                    | <i>F</i> | <i>p</i> |                                    | <i>F</i> | <i>p</i> |
| Model                              | 68.52    | <0.0001  | Model                              | 82.40    | <0.0001  |
| A-ACN                              | 499.26   | <0.0001  | A-ACN                              | 690.50   | <0.0001  |
| B-MeOH                             | 150.25   | <0.0001  | B-MeOH                             | 175.03   | <0.0001  |
| C-TEA                              | 43.80    | <0.0001  | C-TEA                              | 66.05    | <0.0001  |
| D-NaH <sub>2</sub> PO <sub>4</sub> | 1.38     | 0.2482   | D-NaH <sub>2</sub> PO <sub>4</sub> | 2.72     | 0.1081   |
| E-pH                               | 17.74    | 0.0002   | E-pH                               | 70.47    | <0.0001  |
| F- flow                            | 86.62    | <0.0001  | F- flow                            | 151.31   | <0.0001  |
| AB                                 | 26.54    | <0.0001  | AB                                 | 35.88    | <0.0001  |
| AC                                 | 15.48    | 0.0004   | AC                                 | 31.09    | <0.0001  |
| CD                                 | 11.01    | 0.0021   | AE                                 | 22.32    | <0.0001  |
| CE                                 | 8.58     | 0.0060   | AF                                 | 35.40    | <0.0001  |
| A <sup>2</sup>                     | 61.89    | 0.0374   | CD                                 | 17.57    | 0.0002   |
| C <sup>2</sup>                     | 54.36    | <0.0001  | CE                                 | 9.61     | 0.0038   |
| D <sup>2</sup>                     | 11.70    | 0.0016   | CF                                 | 5.94     | 0.0200   |
|                                    |          |          | A <sup>2</sup>                     | 67.46    | <0.0001  |
|                                    |          |          | C <sup>2</sup>                     | 46.91    | <0.0001  |

Table S.3f. The number of theoretical plates for CIPRO and LEVO.

| Parameter                          | CIPRO    |          | Parameter                          | LEVO     |          |
|------------------------------------|----------|----------|------------------------------------|----------|----------|
|                                    | <i>F</i> | <i>p</i> |                                    | <i>F</i> | <i>p</i> |
| Model                              | 31.22    | <0.0001  | Model                              | 21.52    | <0.0001  |
| A-ACN                              | 7.41     | 0.0112   | A-ACN                              | 66.95    | <0.0001  |
| B-MeOH                             | 68.27    | <0.0001  | B-MeOH                             | 6.96     | 0.0116   |
| C-TEA                              | 0.00     | 0.9953   | C-TEA                              | 31.08    | <0.0001  |
| D-NaH <sub>2</sub> PO <sub>4</sub> | 0.22     | 0.6417   | D-NaH <sub>2</sub> PO <sub>4</sub> | 0.71     | 0.4035   |
| E-pH                               | 8.56     | 0.0069   | E-pH                               | 63.45    | <0.0001  |
| F- flow                            | 38.78    | <0.0001  | F- flow                            | 4.83     | 0.0336   |
| AC                                 | 19.99    | 0.0001   | AC                                 | 80.18    | 0.0066   |
| CD                                 | 74.69    | <0.0001  | CD                                 | 17.03    | 0.0002   |
| A <sup>2</sup>                     | 49.38    | <0.0001  | C <sup>2</sup>                     | 5.18     | 0.0280   |
| B <sup>2</sup>                     | 43.75    | <0.0001  | D <sup>2</sup>                     | 12.23    | 0.0011   |
| C <sup>2</sup>                     | 9.50     | 0.0047   | F <sup>2</sup>                     | 5.09     | 0.0293   |
| D <sup>2</sup>                     | 30.43    | <0.0001  |                                    |          |          |

Table S.3g. The Foley-Dorsey parameter for CIPRO and LEVO.

| Parameter                          | CIPRO    |          | Parameter      | LEVO     |          |
|------------------------------------|----------|----------|----------------|----------|----------|
|                                    | <i>F</i> | <i>p</i> |                | <i>F</i> | <i>p</i> |
| Model                              | 38.85    | <0.0001  | Model          | 33.40    | <0.0001  |
| A-ACN                              | 20.40    | <0.0001  | A-ACN          | 304.90   | <0.0001  |
| B-MeOH                             | 130.59   | <0.0001  | B-MeOH         | 15.23    | 0.0005   |
| C-TEA                              | 20.80    | <0.0001  | C-TEA          | 2.06     | 0.1611   |
| D-NaH <sub>2</sub> PO <sub>4</sub> | 2.69     | 0.1114   | E-pH           | 2.04     | 0.1631   |
| E-pH                               | 63.82    | <0.0001  | F- flow        | 4.26     | 0.0478   |
| F- flow                            | 49.66    | <0.0001  | AB             | 38.47    | <0.0001  |
| AB                                 | 77.82    | <0.0001  | AE             | 8.71     | 0.0061   |
| AE                                 | 26.28    | <0.0001  | BE             | 4.65     | 0.0391   |
| A <sup>2</sup>                     | 39.59    | <0.0001  | CE             | 4.54     | 0.0415   |
| C <sup>2</sup>                     | 6.81     | 0.0138   | CF             | 4.93     | 0.0340   |
| D <sup>2</sup>                     | 39.19    | <0.0001  | A <sup>2</sup> | 65.15    | <0.0001  |
| E <sup>2</sup>                     | 20.15    | <0.0001  | C <sup>2</sup> | 7.16     | 0.0120   |
| F <sup>2</sup>                     | 57.22    | <0.0001  | E <sup>2</sup> | 8.19     | 0.0076   |
|                                    |          |          | F <sup>2</sup> | 6.41     | 0.0168   |

Table S.3h. The R<sub>s</sub> value for CIPRO and LEVO.

| Parameter                          | <i>F</i> | <i>p</i> |
|------------------------------------|----------|----------|
| Model                              | 112.62   | <0.0001  |
| A-ACN                              | 623.62   | <0.0001  |
| B-MeOH                             | 250.55   | <0.0001  |
| C-TEA                              | 73.26    | <0.0001  |
| D-NaH <sub>2</sub> PO <sub>4</sub> | 6.32     | 0.0163   |
| E-pH                               | 183.86   | <0.0001  |
| AB                                 | 19.71    | <0.0001  |
| AC                                 | 14.17    | 0.0006   |
| AE                                 | 31.22    | <0.0001  |
| CD                                 | 15.26    | 0.0004   |
| A <sup>2</sup>                     | 36.02    | <0.0001  |
| C <sup>2</sup>                     | 18.63    | 0.0001   |
| E <sup>2</sup>                     | 6.58     | 0.0144   |

- **The ANOVA test parameters for four-factor analysis**

Table S.4a. The ANOVA test retention time for LEVO and MOXI.

| Parameter                          | LEVO     |          | Parameter      | MOXI     |          |
|------------------------------------|----------|----------|----------------|----------|----------|
|                                    | <i>F</i> | <i>p</i> |                | <i>F</i> | <i>p</i> |
| Model                              | 493.81   | <0.0001  | Model          | 2621.58  | <0.0001  |
| A-ACN                              | 1397.05  | <0.0001  | A-ACN          | 6505.83  | <0.0001  |
| C-NaH <sub>2</sub> PO <sub>4</sub> | 5.74     | 0.0265   | B-TEA          | 5.35     | 0.0315   |
| AC                                 | 16.77    | 0.0006   | A <sup>2</sup> | 2515.45  | <0.0001  |
| A <sup>2</sup>                     | 553.3    | <0.0001  |                |          |          |

Table S.4b. The ANOVA test relative retention time for LEVO and MOXI.

| Parameter      | LEVO     |          | MOXI     |          |
|----------------|----------|----------|----------|----------|
|                | <i>F</i> | <i>p</i> | <i>F</i> | <i>p</i> |
| Model          | 485.40   | <0.0001  | 1761.42  | <0.0001  |
| A-ACN          | 2115.77  | <0.0001  | 6657.95  | <0.0001  |
| B-TEA          | 29.17    | <0.0001  | 50.54    | <0.0001  |
| D-pH           | 0.29     | 0.5990   | 0.21     | 0.6506   |
| A <sup>2</sup> | 124.57   | <0.0001  | 1559.22  | <0.0001  |
| D <sup>2</sup> | 6.04     | 0.0244   | 16.63    | 0.0007   |

Table S.4c. The ANOVA test for symmetry of LEVO and MOXI peaks.

| Parameter                          | LEVO     |          | Parameter                          | MOXI     |          |
|------------------------------------|----------|----------|------------------------------------|----------|----------|
|                                    | <i>F</i> | <i>p</i> |                                    | <i>F</i> | <i>p</i> |
| Model                              | 87.73    | <0.0001  | Model                              | 153.99   | <0.0001  |
| A-ACN                              | 474.16   | <0.0001  | A-ACN                              | 102.14   | <0.0001  |
| B-TEA                              | 6.85     | 0.0345   | B-TEA                              | 263.62   | <0.0001  |
| C-NaH <sub>2</sub> PO <sub>4</sub> | 18.75    | 0.0034   | C-NaH <sub>2</sub> PO <sub>4</sub> | 5.53     | 0.0406   |
| D- pH                              | 0.19     | 0.6738   | D- pH                              | 366.82   | <0.0001  |
| AD                                 | 31.78    | 0.0008   | BD                                 | 23.22    | 0.0007   |
| CD                                 | 32.06    | 0.0088   |                                    |          |          |
| A <sup>2</sup>                     | 32.06    | 0.0008   |                                    |          |          |
| B <sup>2</sup>                     | 11.03    | 0.0128   |                                    |          |          |
| D <sup>2</sup>                     | 147.78   | <0.0001  |                                    |          |          |

Table S.4d. The ANOVA test for tailing of LEVO and MOXI peaks.

| Parameter                           | LEVO     |          | Parameter      | MOXI     |          |
|-------------------------------------|----------|----------|----------------|----------|----------|
|                                     | <i>F</i> | <i>p</i> |                | <i>F</i> | <i>p</i> |
| Model                               | 235.10   | <0.0001  | Model          | 77.80    | <0.0001  |
| A- ACN                              | 469.02   | <0.0001  | A- ACN         | 237.73   | <0.0001  |
| B- TEA                              | 215.24   | <0.0001  | B- TEA         | 30.66    | <0.0001  |
| C- NaH <sub>2</sub> PO <sub>4</sub> | 7.37     | 0.0238   | D- pH          | 52.75    | <0.0001  |
| D- pH                               | 126.61   | <0.0001  | A <sup>2</sup> | 115.75   | <0.0001  |
| AB                                  | 78.94    | <0.0001  |                |          |          |
| A <sup>2</sup>                      | 292.23   | <0.0001  |                |          |          |
| C <sup>2</sup>                      | 186.68   | <0.0001  |                |          |          |
| D <sup>2</sup>                      | 131.68   | <0.0001  |                |          |          |

Table S.4e. The ANOVA test of peak width in half-height of LEVO and MOXI.

| Parameter                           | LEVO     |          | Parameter                           | MOXI     |          |
|-------------------------------------|----------|----------|-------------------------------------|----------|----------|
|                                     | <i>F</i> | <i>p</i> |                                     | <i>F</i> | <i>p</i> |
| Model                               | 69.58    | <0.0001  | Model                               | 634.66   | <0.0001  |
| A-ACN                               | 33.43    | <0.0001  | A-ACN                               | 3621.24  | <0.0001  |
| B- TEA                              | 1.46     | 0.2456   | B-TEA                               | 32.17    | <0.0001  |
| C- NaH <sub>2</sub> PO <sub>4</sub> | 1.07     | 0.3171   | C- NaH <sub>2</sub> PO <sub>4</sub> | 1.91     | 0.1872   |
| D-pH                                | 33.03    | <0.0001  | D-pH                                | 34.99    | <0.0001  |
| AB                                  | 16.95    | 0.0009   | AC                                  | 6.00     | 0.0270   |
| AC                                  | 3.60     | 0.0773   | AD                                  | 25.52    | 0.0001   |
| AD                                  | 8.63     | 0.0102   | A <sup>2</sup>                      | 1882.05  | <0.0001  |
| BD                                  | 3.33     | 0.0880   | B <sup>2</sup>                      | 6.16     | 0.0254   |
| A <sup>2</sup>                      | 524.72   | <0.0001  | D <sup>2</sup>                      | 13.60    | 0.0022   |

Table S.4f. The ANOVA test for a number of theoretical plates for LEVO and MOXI.

| Parameter                           | LEVO     |          | Parameter      | MOXI     |          |
|-------------------------------------|----------|----------|----------------|----------|----------|
|                                     | <i>F</i> | <i>p</i> |                | <i>F</i> | <i>p</i> |
| Model                               | 221.58   | <0.0001  | Model          | 106.56   | <0.0001  |
| A- ACN                              | 604.84   | <0.0001  | A-ACN          | 330.97   | <0.0001  |
| B- TEA                              | 29.55    | 0.0006   | B-TEA          | 65.20    | <0.0001  |
| C- NaH <sub>2</sub> PO <sub>4</sub> | 0.44     | 0.5252   | D-pH           | 91.17    | <0.0001  |
| D- pH                               | 266.06   | <0.0001  | AD             | 13.30    | 0.0018   |
| AB                                  | 48.72    | 0.0001   | A <sup>2</sup> | 132.15   | <0.0001  |
| BD                                  | 33.78    | 0.0004   | D <sup>2</sup> | 23.13    | 0.0001   |
| A <sup>2</sup>                      | 1013.29  | <0.0001  |                |          |          |
| B <sup>2</sup>                      | 20.59    | 0.0019   |                |          |          |
| C <sup>2</sup>                      | 66.69    | <0.0001  |                |          |          |
| D <sup>2</sup>                      | 32.38    | 0.0005   |                |          |          |



Table S.4g. The ANOVA test for Foley-Dorsey for LEVO and MOXI.

| Parameter      | LEVO     |          | Parameter                           | MOXI     |          |
|----------------|----------|----------|-------------------------------------|----------|----------|
|                | <i>F</i> | <i>p</i> |                                     | <i>F</i> | <i>p</i> |
| Model          | 23.77    | <0.0001  | Model                               | 19.41    | <0.0001  |
| A- ACN         | 2.92     | 0.1031   | A- ACN                              | 0.08     | 0.7864   |
| B-TEA          | 7.74     | 0.0115   | B-TEA                               | 33.02    | <0.0001  |
| D-pH           | 19.27    | 0.0003   | C- NaH <sub>2</sub> PO <sub>4</sub> | 0.18     | 0.6731   |
| A <sup>2</sup> | 65.13    | <0.0001  | D-pH                                | 71.35    | <0.0001  |
|                |          |          | AD                                  | 11.58    | 0.0034   |
|                |          |          | C <sup>2</sup>                      | 3.60     | 0.0751   |
|                |          |          | D <sup>2</sup>                      | 12.57    | 0.0025   |

Table S.4h. The ANOVA test for R<sub>s</sub> value for LEVO and MOXI.

| Parameter      | <i>F</i> | <i>p</i> |
|----------------|----------|----------|
| Model          | 481.78   | <0.0001  |
| A-ACN          | 1744.13  | <0.0001  |
| D-pH           | 13.87    | 0.0013   |
| AD             | 10.44    | 0.0042   |
| A <sup>2</sup> | 158.69   | <0.0001  |

- **The validation parameters**

Table S.5. The precision and accuracy results for CIPRO, LEVO and MOXI

| Nominal concentration [mg/ml] | Inter-day assay |              | Intra-day assay |              |
|-------------------------------|-----------------|--------------|-----------------|--------------|
|                               | Precision [%]   | Accuracy [%] | Precision [%]   | Accuracy [%] |
| <b>CIPROFLOXACIN</b>          |                 |              |                 |              |
| 0.4                           | 9.62            | 5.70         | 3.92            | 5.41         |
| 2                             | 3.65            | 5.96         | 4.21            | 0.71         |
| 4                             | 4.94            | 7.02         | 1.44            | 0.18         |
| 8                             | 2.73            | 0.81         | 1.42            | 5.32         |
| <b>LEVOFLOXACIN</b>           |                 |              |                 |              |
| 0.5                           | 8.78            | 5.05         | 7.33            | 8.44         |
| 2                             | 7.69            | 6.14         | 4.38            | 4.87         |
| 4                             | 3.31            | 1.68         | 2.84            | 2.70         |
| 8                             | 3.62            | 0.27         | 1.39            | 3.84         |
| <b>MOXIFLOXACIN</b>           |                 |              |                 |              |
| 0.2                           | 8.27            | 6.67         | 5.74            | 5.21         |
| 1                             | 8.89            | 8.95         | 6.31            | 5.20         |
| 4                             | 2.99            | 3.19         | 3.62            | 3.42         |
| 8                             | 3.88            | 1.16         | 7.49            | 1.62         |

Table S.6. The stability of the analytes

| Experimental conditions                                 | Concentration [mg/l] |      |
|---------------------------------------------------------|----------------------|------|
|                                                         | 2                    | 8    |
| <b>CIPROFLOXACIN</b>                                    |                      |      |
| After storage at room temperature for 24 h              |                      |      |
| Mean assayed value [mg/l]                               | 2.12                 | 7.89 |
| Accuracy [%RE]                                          | 6.50                 | 4.22 |
| After three freeze-thaw cycles                          |                      |      |
| Mean assayed value [mg/l]                               | 2.11                 | 8.06 |
| Accuracy [%RE]                                          | 2.76                 | 0.50 |
| After storage for three months at the temperature -20°C |                      |      |
| Mean assayed value [mg/l]                               | 2.09                 | 8.06 |
| Accuracy [%RE]                                          | 5.08                 | 5.32 |
| <b>LEVOFLOXACIN</b>                                     |                      |      |
| After storage at room temperature for 24 h              |                      |      |
| Mean assayed value [mg/l]                               | 2.13                 | 8.31 |
| Accuracy [%RE]                                          | 1.42                 | 2.00 |
| After three freeze-thaw cycles                          |                      |      |
| Mean assayed value [mg/l]                               | 1.94                 | 7.84 |
| Accuracy [%RE]                                          | 2.51                 | 2.03 |
| After storage for three months at the temperature -20°C |                      |      |
| Mean assayed value [mg/l]                               | 2.05                 | 8.19 |
| Accuracy [%RE]                                          | 2.50                 | 2.63 |
| <b>MOXIFLOXACIN</b>                                     |                      |      |
| After storage at room temperature for 24 h              |                      |      |
| Mean assayed value [mg/l]                               | 2.05                 | 8.10 |
| Accuracy [%RE]                                          | 2.50                 | 1.25 |
| After three freeze-thaw cycles                          |                      |      |
| Mean assayed value [mg/l]                               | 2.07                 | 8.04 |
| Accuracy [%RE]                                          | 3.50                 | 1.36 |
| After storage for three months at the temperature -20°C |                      |      |
| Mean assayed value [mg/l]                               | 2.12                 | 8.21 |
| Accuracy [%RE]                                          | 6.00                 | 2.62 |

- **The designs of the experiments**

Table S.7. The four-factor Box-Behnken Design for LEVO and MOXI analysis.

| FACTOR |    |    |    |
|--------|----|----|----|
| A      | B  | C  | D  |
| ±1     | ±1 | 0  | 0  |
| 0      | 0  | ±1 | ±1 |
| 0      | 0  | 0  | 0  |
| ±1     | 0  | 0  | ±1 |
| 0      | ±1 | ±1 | 0  |
| 0      | 0  | 0  | 0  |
| ±1     | 0  | ±1 | 0  |
| 0      | ±1 | 0  | ±1 |
| 0      | 0  | 0  | 0  |

Table S.8. The six-factor Box-Behnken Design for CIPRO and LEVO analysis

| FACTOR |    |    |    |    |    |
|--------|----|----|----|----|----|
| A      | B  | C  | D  | E  | F  |
| ±1     | ±1 | 0  | ±1 | 0  | 0  |
| 0      | ±1 | ±1 | 0  | ±1 | 0  |
| 0      | 0  | ±1 | ±1 | 0  | ±1 |
| ±1     | 0  | 0  | ±1 | ±1 | 0  |
| 0      | ±1 | 0  | 0  | ±1 | ±1 |
| ±1     | 0  | ±1 | 0  | 0  | ±1 |
| 0      | 0  | 0  | 0  | 0  | 0  |

## PART B – The polynomial equations for the parameters of the chromatographic separation

- The equations for six-factor analysis.

$$t_{R \text{ CIPRO}} = 6.54 - 9.99 \text{ ACN} - 4.19 \text{ MeOH} - 0.492 \text{ TEA} + 0.175 \text{ pH} - 3.79 \text{ flow} + 8.81 \text{ ACN} \times \text{MeOH} + 2.90 \text{ ACN} \times \text{flow} + 1.44 \text{ MeOH} \times \text{flow} + 4.00 \text{ ACN}^2 + 0.813 \text{ MeOH}^2 + 1.49 \text{ TEA}^2 + 0.764 \text{ pH}^2 + 1.09 \text{ flow}^2$$

$$t_{R \text{ LEVO}} = 5.97 - 6.15 \text{ ACN} - 0.34 \text{ MeOH} - 0.718 \times \text{TEA} + 0.573 \text{ pH} - 3.29 \text{ flow} + 3.03 \text{ ACN} \times \text{MeOH} + 1.89 \text{ ACN} \times \text{flow} + 1.35 \text{ MeOH} \times \text{flow} + 2.71 \text{ ACN}^2 + 0.703 \text{ MeOH}^2 + 1.35 \text{ TEA}^2 + 0.707 \text{ pH}^2 + 0.893 \text{ flow}^2$$

$$\text{RRT}_{\text{CIPRO}} = 1.17 - 0.097 \text{ ACN} - 0.043 \text{ MeOH} + 0.023 \text{ TEA} + 0.012 \text{ NaH}_2\text{PO}_4 - 0.037 \text{ pH} + 0.0016 \text{ flow} + 0.027 \text{ ACN} \times \text{MeOH} + 0.0161 \text{ ACN} \times \text{pH} + 0.0434 \text{ ACN}^2 - 0.0184 \text{ TEA}^2 - 0.0098 \text{ NaH}_2\text{PO}_4^2 - 0.0144 \text{ pH}^2 + 0.0127 \text{ flow}^2$$

$$\text{RRT}_{\text{LEVO}} = 0.85 + 0.069 \text{ ACN} + 0.031 \text{ MeOH} - 0.0138 \text{ TEA} - 0.0065 \text{ NaH}_2\text{PO}_4 + 0.0238 \text{ pH} - 0.0022 \text{ flow} - 0.0118 \text{ ACN} \times \text{MeOH} - 0.0101 \text{ ACN} \times \text{pH} - 0.0229 \text{ ACN}^2 + 0.0095 \text{ TEA}^2 + 0.0073 \text{ NaH}_2\text{PO}_4^2 + 0.0101 \text{ pH}^2 - 0.0083 \text{ flow}^2$$

$$\text{Sym}_{\text{CIPRO}} = 1.19 + 0.0051 \text{ ACN} + 0.0325 \text{ MeOH} - 0.093 \text{ TEA} - 0.039 \text{ NaH}_2\text{PO}_4 + 0.130 \text{ pH} - 0.013 \text{ flow} + 0.052 \text{ ACN} \times \text{MeOH} + 0.24 \text{ MeOH} \times \text{TEA} + 0.039 \text{ MeOH} \times \text{NaH}_2\text{PO}_4 + 0.027 \text{ MeOH} \times \text{pH} + 0.098 \text{ TEA} \times \text{NaH}_2\text{PO}_4 - 0.033 \text{ NaH}_2\text{PO}_4 \times \text{flow} - 0.088 \text{ ACN}^2 + 0.188 \text{ TEA}^2 - 0.041 \text{ NaH}_2\text{PO}_4^2 + 0.058 \text{ pH}^2 - 0.25 \text{ flow}^2$$

$$\text{Sym}_{\text{LEVO}} = 1.55 - 0.207 \text{ ACN} - 0.102 \text{ MeOH} - 0.057 \text{ TEA} - 0.027 \text{ NaH}_2\text{PO}_4 + 0.098 \text{ pH} - 0.044 \text{ flow} - 0.066 \text{ ACN} \times \text{MeOH} + 0.123 \text{ ACN} \times \text{TEA} + 0.060 \text{ ACN} \times \text{NaH}_2\text{PO}_4 - 0.177 \text{ ACN} \times \text{pH} - 0.257 \text{ MeOH} \times \text{TEA} - 0.062 \text{ MeOH} \times \text{pH} - 0.122 \text{ TEA} \times \text{NaH}_2\text{PO}_4 + 0.056 \text{ TEA} \times \text{pH} + 0.028 \text{ TEA} \times \text{flow} - 0.065 \text{ pH} \times \text{flow} - 0.129 \text{ MeOH}^2 - 0.189 \text{ TEA}^2 - 0.097 \text{ NaH}_2\text{PO}_4^2 - 0.150 \text{ pH}^2 - 0.103 \text{ flow}^2$$

$$\text{Tf}_{\text{CIPRO}} = 1.16 + 0.0070 \text{ ACN} + 0.067 \text{ MeOH} - 0.157 \text{ TEA} - 0.0504 \text{ NaH}_2\text{PO}_4 + 0.154 \text{ pH} - 0.0209 \text{ flow} + 0.119 \text{ ACN} \times \text{MeOH} + 0.049 \text{ ACN} \times \text{NaH}_2\text{PO}_4 + 0.055 \text{ ACN} \times \text{pH} + 0.073 \text{ MeOH} \times \text{NaH}_2\text{PO}_4 + 0.0406 \text{ MeOH} \times \text{pH} + 0.130 \text{ TEA} \times \text{NaH}_2\text{PO}_4 - 0.476 \text{ TEA} \times \text{pH} - 0.080 \text{ ACN}^2 + 0.121 \text{ MeOH}^2 + 0.356 \text{ TEA}^2 + 0.136 \text{ pH}^2 - 0.346 \text{ flow}^2$$

$$\text{Tf}_{\text{LEVO}} = 1.38 - 0.258 \text{ ACN} - 0.101 \text{ MeOH} - 0.062 \text{ TEA} - 0.048 \text{ NaH}_2\text{PO}_4 + 0.044 \text{ pH} - 0.035 \text{ flow} - 0.050 \text{ ACN} \times \text{MeOH} + 0.138 \text{ ACN} \times \text{TEA} + 0.060 \text{ ACN} \times \text{NaH}_2\text{PO}_4 - 0.106 \text{ ACN} \times \text{pH} - 0.237 \text{ MeOH} \times \text{TEA} - 0.113 \text{ TEA} \times \text{NaH}_2\text{PO}_4 - 0.057 \text{ NaH}_2\text{PO}_4 \times \text{pH} - 0.064 \text{ pH} \times \text{flow} - 0.088 \text{ MeOH}^2 - 0.180 \text{ TEA}^2 - 0.125 \text{ NaH}_2\text{PO}_4^2 - 0.135 \text{ pH}^2 - 0.099 \text{ flow}^2$$

$$\text{N}_{\text{CIPRO}} = 4132.33 - 121.72 \text{ ACN} - 364.30 \text{ MeOH} - 0.268 \text{ TEA} + 22.06 \text{ NaH}_2\text{PO}_4 - 140.19 \text{ pH} - 269.84 \text{ flow} - 320.59 \text{ ACN} \times \text{TEA} - 681.09 \text{ TEA} \times \text{NaH}_2\text{PO}_4 + 455.65 \text{ ACN}^2 + 445.4 \text{ MeOH}^2 - 202.03 \text{ TEA}^2 + 359.22 \text{ NaH}_2\text{PO}_4^2$$

$$\text{N}_{\text{LEVO}} = 4243.87 + 378.50 \text{ ACN} + 122.05 \text{ MeOH} + 257.88 \text{ TEA} + 39.04 \text{ NaH}_2\text{PO}_4 - 368.49 \text{ pH} - 101.65 \text{ flow} - 229.13 \text{ ACN} \times \text{TEA} - 330.63 \text{ TEA} \times \text{NaH}_2\text{PO}_4 - 155.53 \text{ TEA}^2 + 223.51 \text{ NaH}_2\text{PO}_4^2 - 154.19 \text{ flow}^2$$

$$\mathbf{FD}_{\text{CIPRO}} = 1854.32 - 196.95 \text{ ACN} - 442.25 \text{ MeOH} + 168.66 \text{ TEA} + 63.03 \text{ NaH}_2\text{PO}_4 - 347.16 \text{ pH} - 284.60 \text{ flow} - 577.07 \text{ ACN} \times \text{MeOH} + 400.26 \text{ ACN} \times \text{pH} + 370.04 \text{ ACN}^2 - 152.47 \text{ TEA}^2 + 377.96 \text{ NaH}_2\text{PO}_4^2 - 253.66 \text{ pH}^2 - 463.82 \text{ flow}^2$$

$$\mathbf{FD}_{\text{LEVO}} = 4595.36 + 872.29 \text{ ACN} + 159.26 \text{ MeOH} - 66.24 \text{ TEA} + 67.46 \text{ pH} - 88.87 \text{ flow} - 414.50 \text{ ACN} \times \text{MeOH} + 272.92 \text{ ACN} \times \text{pH} + 117.08 \text{ MeOH} \times \text{pH} - 182.22 \text{ TEA} \times \text{pH} - 124.74 \text{ TEA} \times \text{flow} + 548.77 \text{ ACN}^2 + 179.30 \text{ TEA}^2 + 179.90 \text{ pH}^2 - 165.56 \text{ flow}^2$$

$$\mathbf{R}_S = 1.79 - 0.79 \text{ ACN} - 0.55 \text{ MeOH} + 0.31 \text{ TEA} + 0.099 \text{ NaH}_2\text{PO}_4 - 0.475 \text{ pH} + 0.26 \text{ ACN} \times \text{MeOH} - 0.24 \text{ ACN} \times \text{TEA} + 0.33 \text{ ACN} \times \text{pH} - 0.25 \text{ TEA} \times \text{NaH}_2\text{PO}_4 + 0.30 \text{ ACN}^2 - 0.218 \text{ TEA}^2 - 0.128 \text{ pH}^2$$

$$\mathbf{Peak\ width}_{\text{CIPRO}} = 0.25 - 0.360 \text{ ACN} - 0.190 \text{ MeOH} - 0.097 \text{ TEA} - 0.017 \text{ NaH}_2\text{PO}_4 + 0.060 \text{ pH} - 0.142 \text{ flow} + 0.154 \text{ ACN} \times \text{MeOH} + 0.114 \text{ ACN} \times \text{TEA} + 0.0798 \text{ TEA} \times \text{NaH}_2\text{PO}_4 - 0.070 \text{ TEA} \times \text{pH} + 0.18 \text{ ACN}^2 + 0.15 \text{ TEA}^2 - 0.075 \text{ NaH}_2\text{PO}_4^2$$

$$\mathbf{Peak\ width}_{\text{LEVO}} = 0.38 - 0.480 \text{ ACN} - 0.250 \text{ MeOH} - 0.140 \text{ TEA} - 0.029 \text{ NaH}_2\text{PO}_4 + 0.140 \text{ pH} - 0.213 \text{ flow} + 0.216 \text{ ACN} \times \text{MeOH} + 0.163 \text{ ACN} \times \text{TEA} - 0.138 \text{ ACN} \times \text{pH} + 0.174 \text{ ACN} \times \text{flow} + 0.123 \text{ TEA} \times \text{NaH}_2\text{PO}_4 - 0.091 \text{ TEA} \times \text{pH} + 0.050 \text{ TEA} \times \text{flow} + 0.199 \text{ ACN}^2 + 0.163 \text{ TEA}^2$$

- **The equations for four-factor analysis.**

$$\mathbf{t}_{\text{R MOXI}} = 3.44 - 5.69 \text{ ACN} - 0.16 \text{ TEA} + 4.64 \text{ ACN}^2$$

$$\mathbf{t}_{\text{R LEVO}} = 2.71 - 1.29 \text{ ACN} + 0.083 \text{ NaH}_2\text{PO}_4 - 0.24 \text{ ACN} \times \text{NaH}_2\text{PO}_4 + 1.092 \text{ ACN}^2$$

$$\mathbf{RRT}_{\text{MOXI}} = 1.35 - 0.887 \text{ ACN} - 0.077 \text{ TEA} + 0.0047 \text{ pH} + 0.568 \text{ ACN}^2 + 0.0579 \text{ pH}^2$$

$$\mathbf{RRT}_{\text{LEVO}} = 0.74 + 0.285 \text{ ACN} + 0.033 \text{ TEA} - 0.0031 \text{ pH} - 0.0914 \text{ ACN}^2 - 0.0199 \text{ pH}^2$$

$$\mathbf{Sym}_{\text{MOXI}} = 1.48 + 0.105 \text{ ACN} - 0.1405 \text{ TEA} - 0.020 \text{ NaH}_2\text{PO}_4 + 0.144 \text{ pH} - 0.057 \text{ TEA} \times \text{pH}$$

$$\mathbf{Sym}_{\text{LEVO}} = 1.47 - 0.19 \text{ ACN} + 0.032 \text{ TEA} + 0.032 \text{ NaH}_2\text{PO}_4 + 0.0044 \text{ pH} - 0.104 \text{ ACN} \times \text{pH} - 0.149 \text{ NaH}_2\text{PO}_4 \times \text{pH} - 0.069 \text{ ACN}^2 - 0.0404 \text{ TEA}^2 + 0.14 \text{ pH}^2$$

$$\mathbf{T}_{\text{f MOXI}} = 1.64 + 0.476 \text{ ACN} - 0.144 \text{ TEA} + 0.181 \text{ pH} + 0.403 \text{ ACN}^2$$

$$\mathbf{T}_{\text{f LEVO}} = 1.55 - 0.345 \text{ ACN} - 0.215 \text{ TEA} + 0.0389 \text{ NaH}_2\text{PO}_4 + 0.1513 \text{ pH} + 0.2745 \text{ ACN} \times \text{TEA} - 0.326 \text{ ACN}^2 + 0.255 \text{ NaH}_2\text{PO}_4^2 + 0.212 \text{ pH}^2$$

$$\mathbf{N}_{\text{MOXI}} = 4401.67 - 1029.83 \text{ ACN} + 457.08 \text{ TEA} - 540.50 \text{ pH} + 357.62 \text{ ACN} \times \text{pH} - 891.06 \text{ ACN}^2 - 372.81 \text{ pH}^2$$

$$\mathbf{N}_{\text{LEVO}} = 4457.67 - 1186.53 \text{ ACN} + 325.88 \text{ TEA} + 34.35 \text{ NaH}_2\text{PO}_4 - 874.41 \text{ pH} - 641.46 \text{ ACN} \times \text{TEA} + 539.89 \text{ TEA} \times \text{pH} - 2029.78 \text{ ACN}^2 - 339.68 \text{ TEA}^2 - 569.84 \text{ NaH}_2\text{PO}_4^2 - 365.33 \text{ pH}^2$$

$$\mathbf{FD}_{\text{MOXI}} = 3910.17 - 26.67 \text{ ACN} + 556.67 \text{ TEA} + 41.58 \text{ NaH}_2\text{PO}_4 - 818.25 \text{ pH} - 571.00 \text{ ACN} \times \text{pH} + 251.50 \text{ NaH}_2\text{PO}_4^2 - 470.25 \text{ pH}^2$$

$$\mathbf{FD}_{\text{LEVO}} = 4063.50 + 317.54 \text{ ACN} + 517.33 \text{ TEA} - 816.00 \text{ pH} - 2012.79 \text{ ACN}^2$$

$$\mathbf{R}_s = 4.77 - 6.90 \text{ ACN} - 0.616 \text{ pH} + 0.925 \text{ ACN} \times \text{pH} + 2.79 \text{ ACN}^2$$

$$\mathbf{PW}_{\text{moxi}} = 0.11 - 0.200 \text{ ACN} - 0.0189 \text{ TEA} + 0.0046 \text{ NaH}_2\text{PO}_4 + 0.020 \text{ pH} - 0.014 \text{ ACN} \times \text{NaH}_2\text{PO}_4 - 0.029 \text{ ACN} \times \text{pH} + 0.204 \text{ ACN}^2 + 0.0117 \text{ TEA}^2 + 0.017 \text{ pH}^2$$

$$\mathbf{PW}_{\text{levo}} = 0.11 - 0.018 \text{ ACN} - 0.0038 \text{ TEA} + 0.0032 \text{ NaH}_2\text{PO}_4 + 0.018 \text{ pH} + 0.022 \text{ ACN} \times \text{TEA} - 0.0102 \text{ ACN} \times \text{NaH}_2\text{PO}_4 - 0.0159 \text{ ACN} \times \text{pH} - 0.0099 \text{ TEA} \times \text{pH} + 0.096 \text{ ACN}^2$$

**PART C –The RSM diagrams for the six- and four-factor BBD**

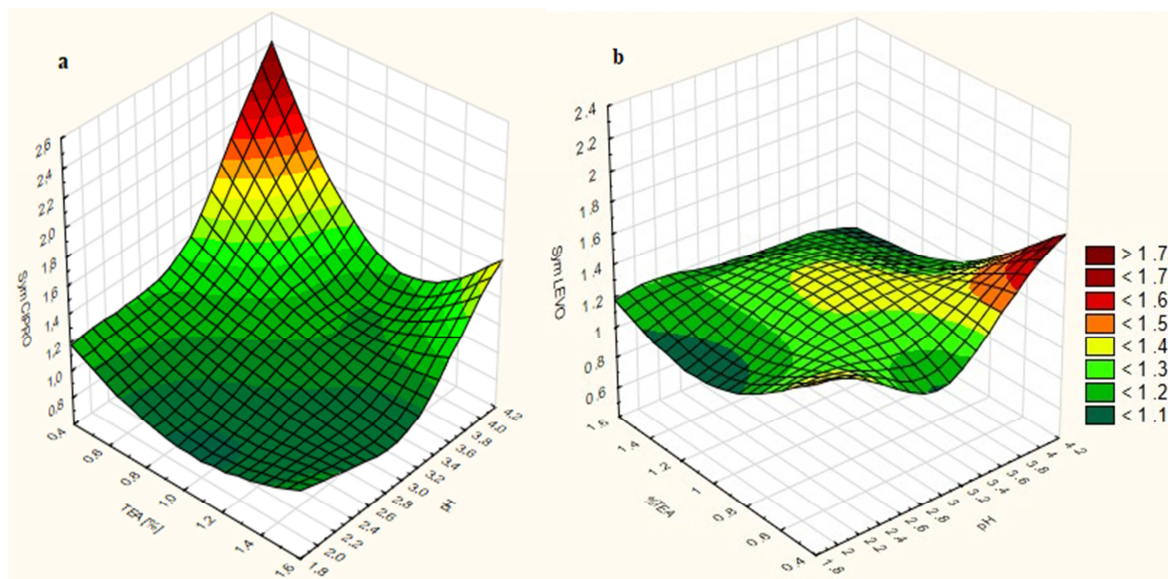

Fig. S.1. The RSM diagram for symmetry (Sym) versus: a) pH and TEA for CIPRO, b) pH and TEA for LEVO for six factors analysis.

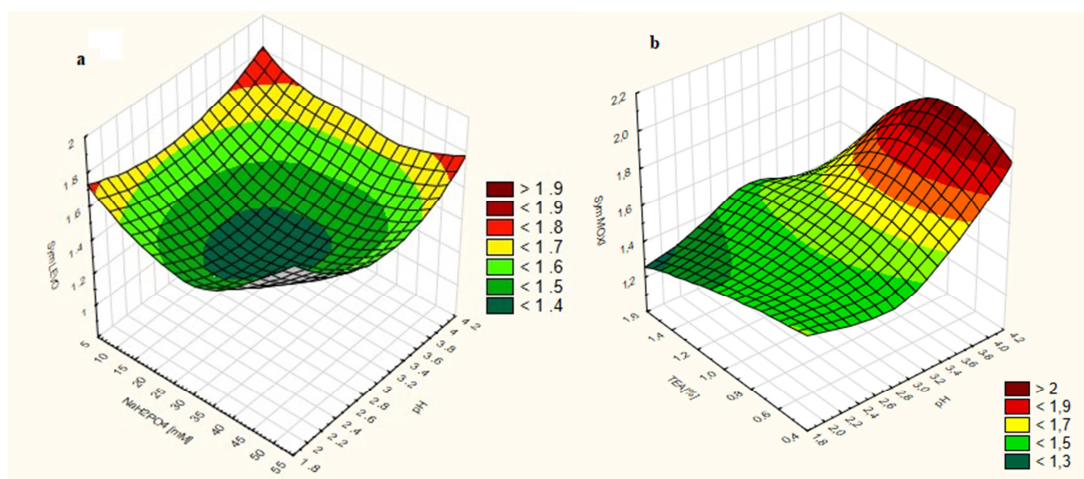

Fig. S.2. The RSM diagram for symmetry (Sym) versus: a) pH and NaH<sub>2</sub>PO<sub>4</sub> for LEVO, b) pH and TEA for MOXI for four factors analysis.

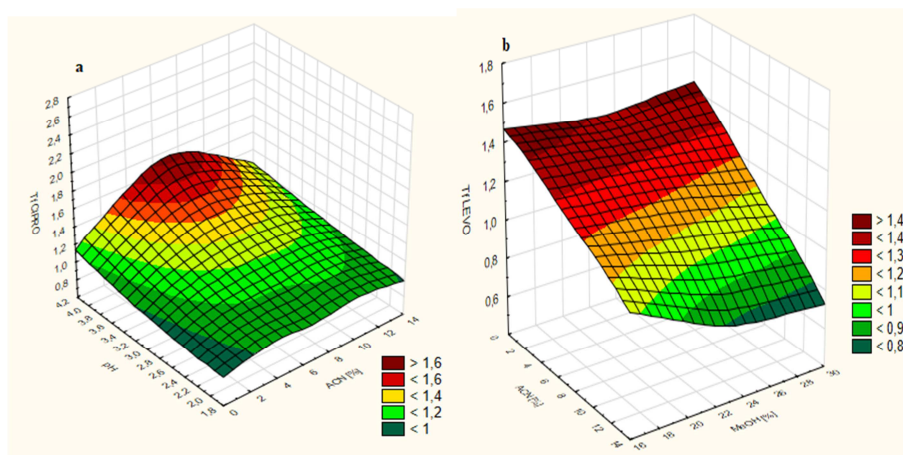

Fig. S.3. The RSM diagram for tailing factor (Tf) versus: a) ACN and pH for CIPRO, b) MeOH and ACN for LEVO for six factors analysis.

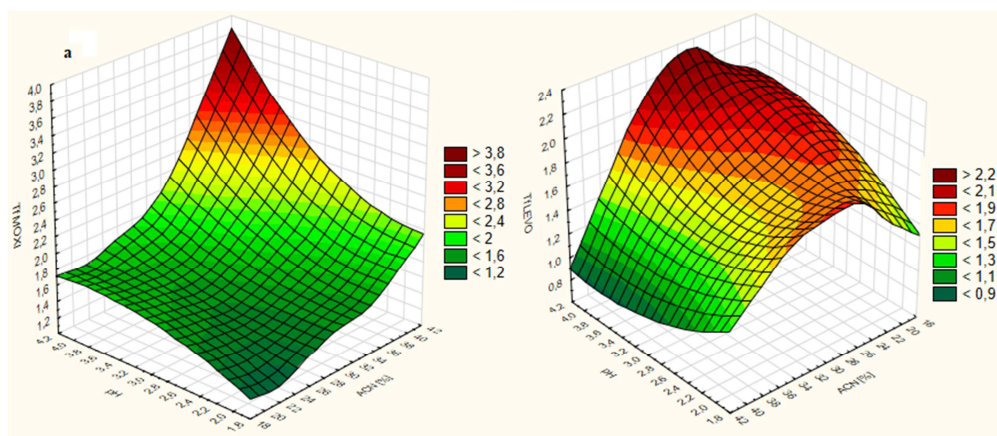

Fig. S.4. The RSM diagram for tailing factor (Tf) versus: a) ACN and pH for MOXI. b) ACN and pH for LEVO for four factors analysis.

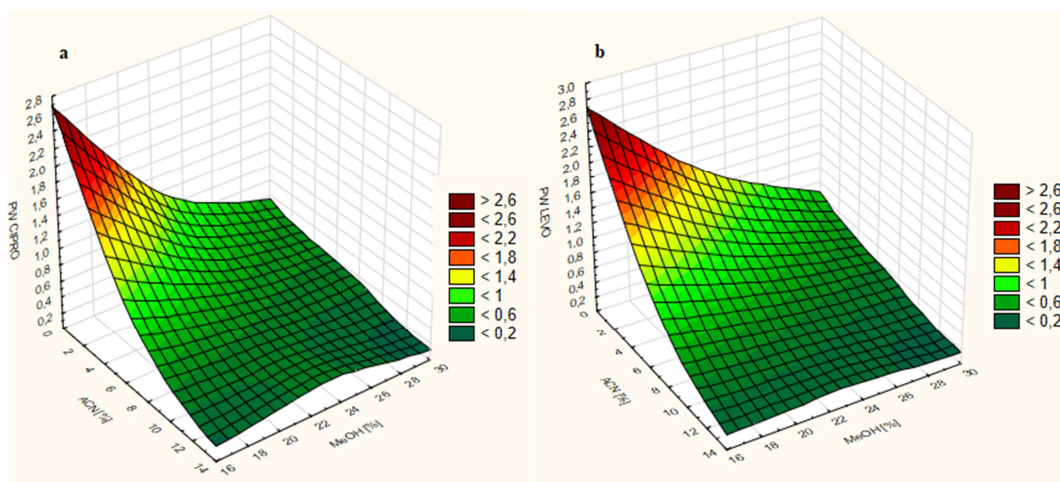

Fig. S.5. The RSM diagram for peak width in half height (PW) versus: a) ACN and MeOH for CIPRO, b) ACN and MeOH for LEVO for six factors analysis.

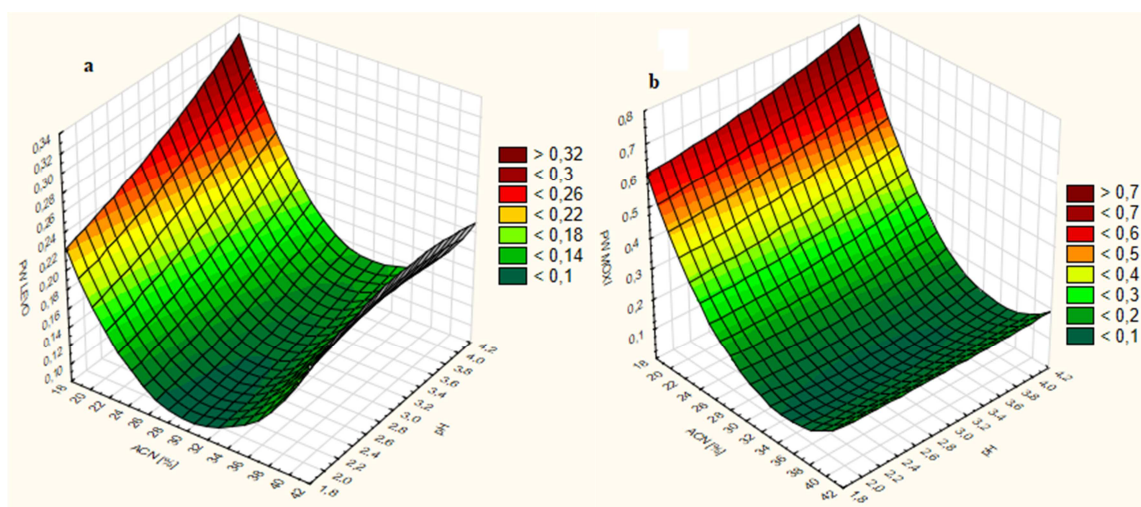

Fig. S.6. The RSM diagram for peak width in half height (PW) versus: a) pH and ACN for LEVO, b) pH and ACN for MOXI for four factors analysis.



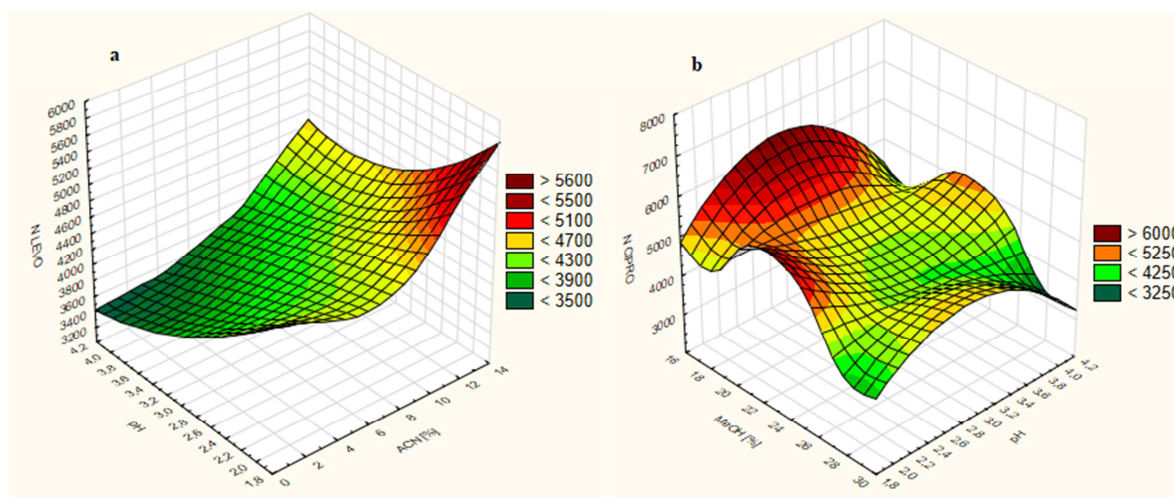

Fig. S.7. The RSM diagram for the number of theoretical plates (N) versus: a) ACN and pH for LEVO, b) MeOH and pH for CIPRO for six factors analysis.

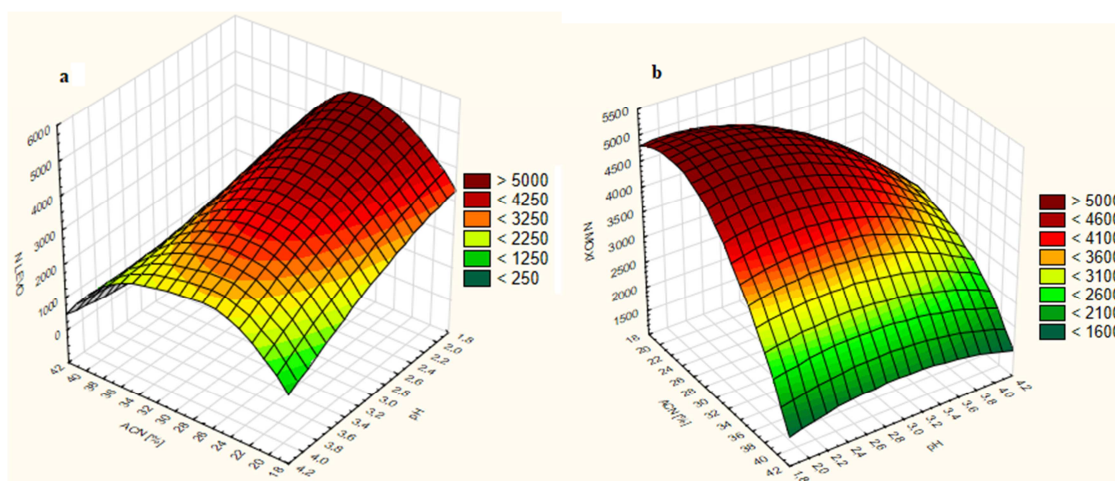

Fig. S.8. The RSM diagram for number of theoretical plates (N) versus: a) pH and ACN for LEVO, b) pH and ACN for MOXI for four factors analysis.

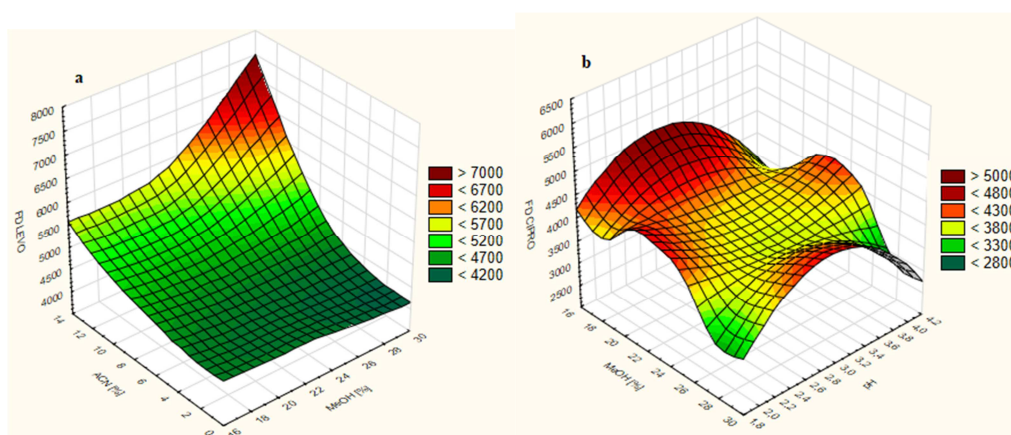

Fig. S.9. The RSM diagram for Foley-Dorsey (FD) versus: a) ACN and MeOH for LEVO, b) MeOH and pH for CIPRO for six factors analysis.

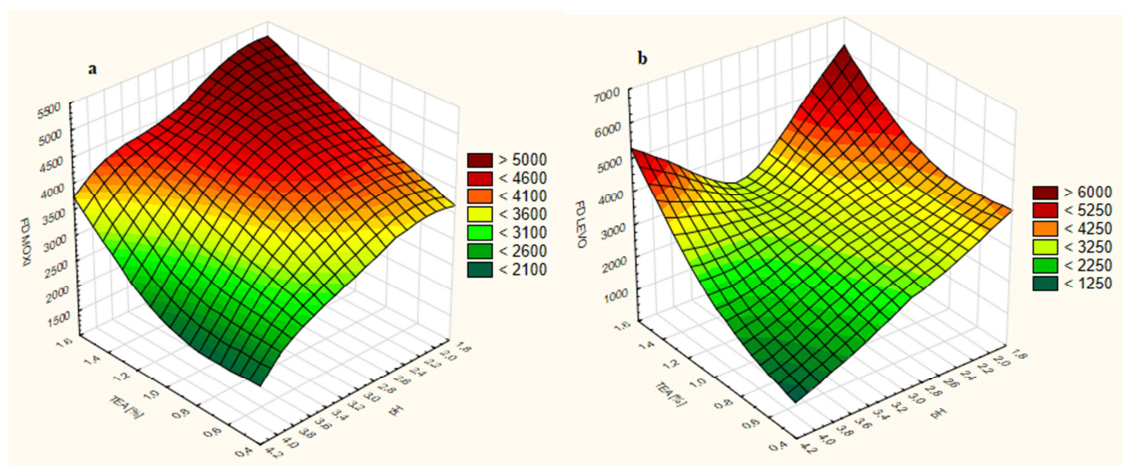

Fig. S.10. The RSM diagram for Foley-Dorsey (FD) versus: a) TEA and pH for MOXI, b) TEA and pH for LEVO for four factors analysis.

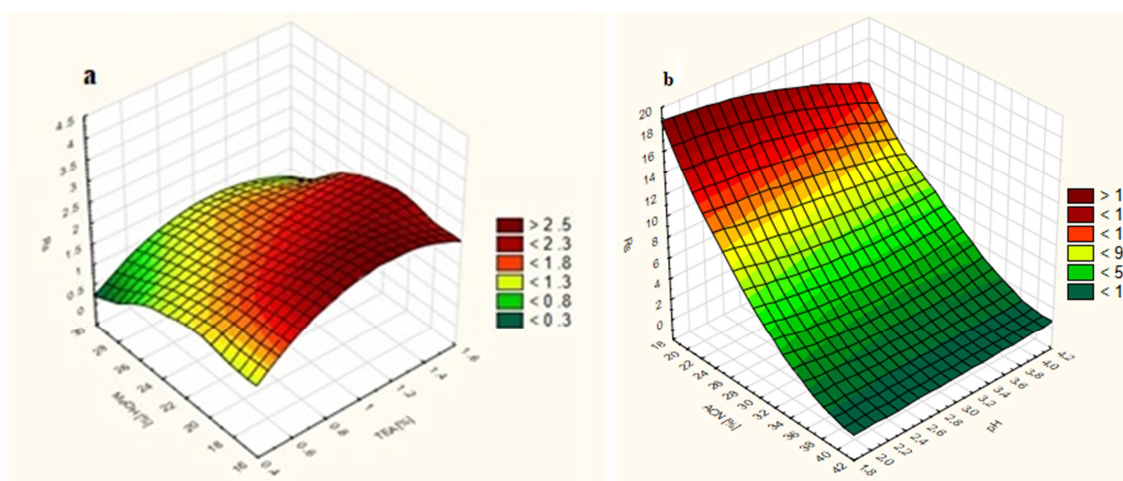

Fig. S.11. The RSM diagram for  $R_s$  for: a) MeOH and TEA for CIPRO/LEVO, b) ACN and pH for LEVO/MOXI for four factors analysis.
